# Supplementary material for: Preserved Left Ventricular Function despite Myocardial Fibrosis and Myopathy in the Dystrophin‐Deficient D2.B10‐Dmdmdx/J Mouse
Source: Hindawi journal article supplement (doi:10.1155/2022/5362115), 2022-01-01

Supplement 1

Appendix A. Western immunoblots for Bax (20kDa) in DBA/2 and treated D2-*mdx* hearts.  
V=Vehicle, P=Perindopril, D=Debio-025, D+P=Debio-025+Perindopril

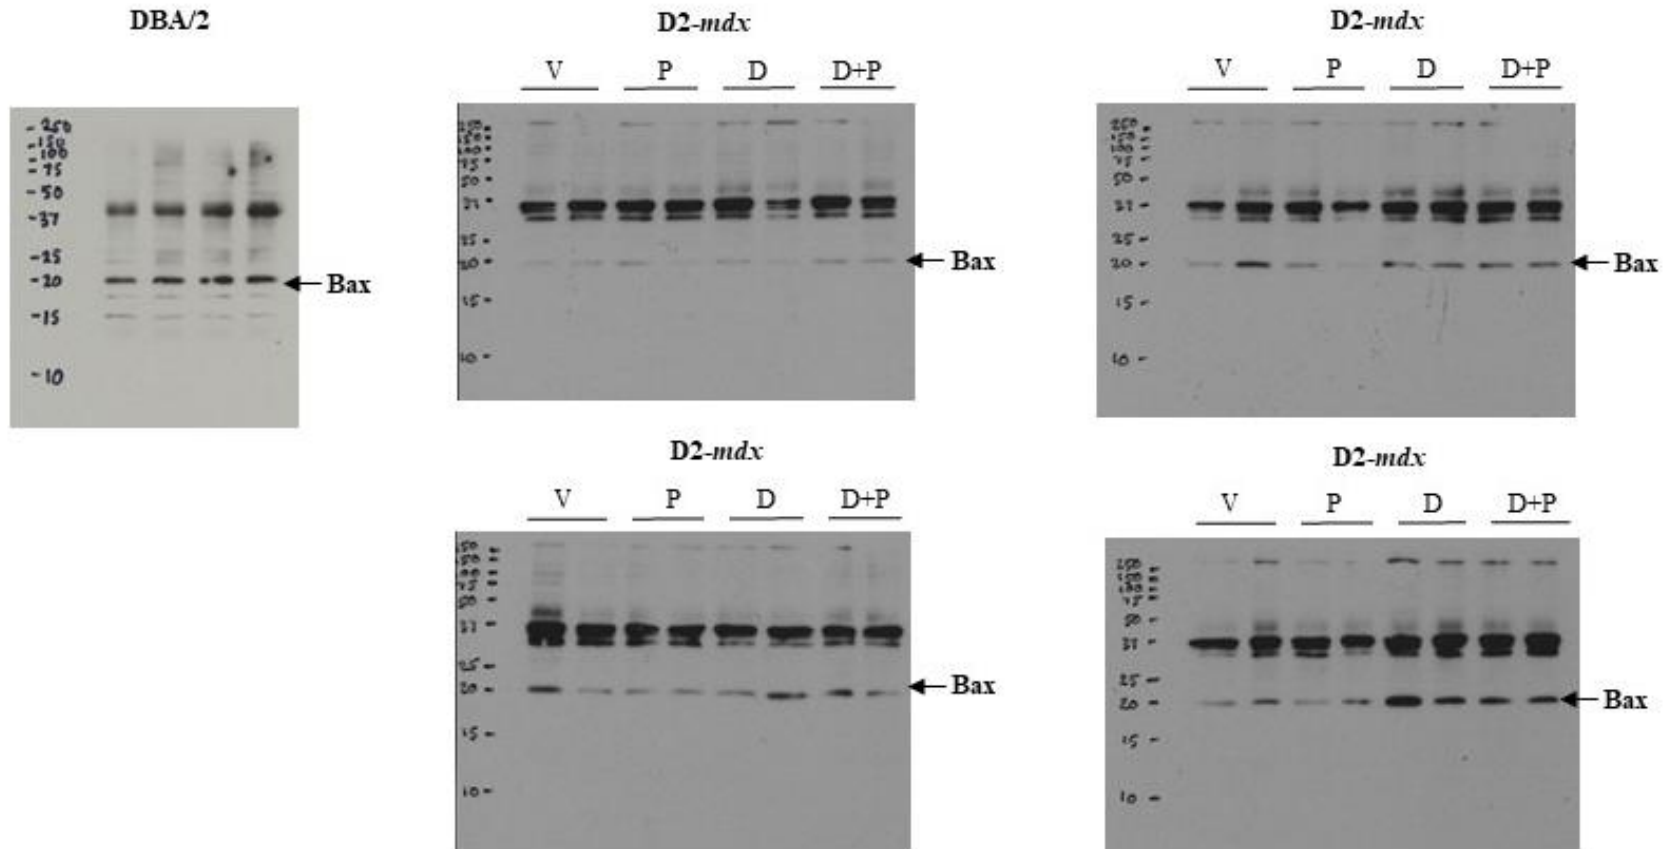

**Appendix B. Western immunoblots for Bcl-2 (28kDa) in DBA/2 and treated D2-*mdx* hearts.**  
V=Vehicle, P=Perindopril, D=Debio-025, D+P=Debio-025+Perindopril

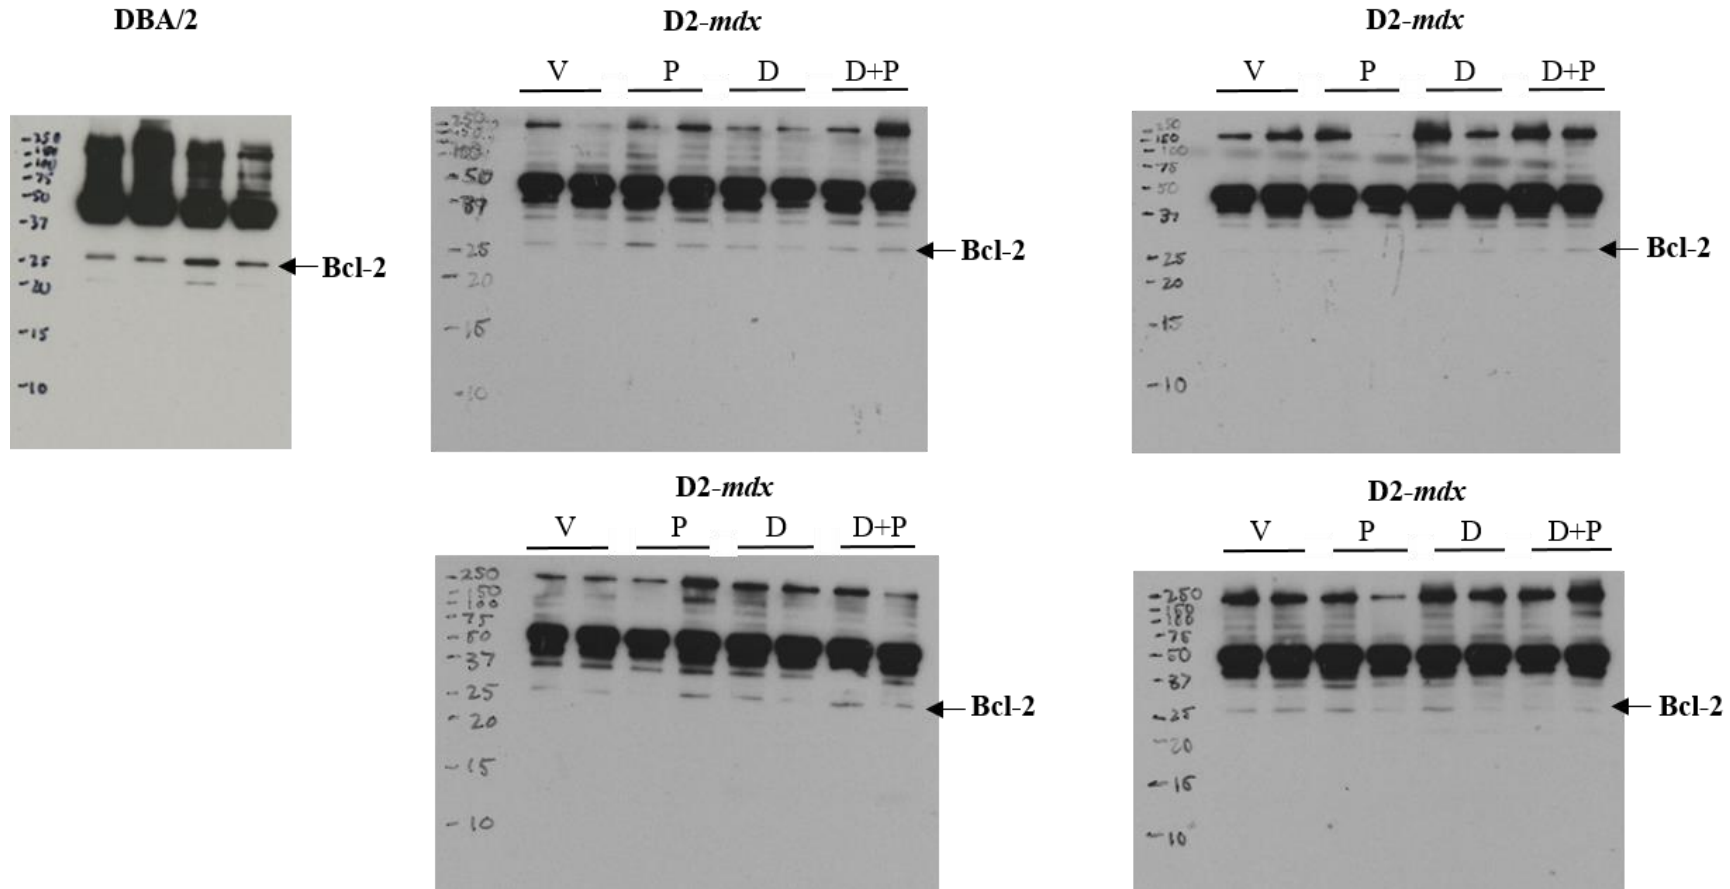

**Appendix C. Western immunoblots for Caspase-3 (35kDa; uncleaved) in DBA/2 and treated D2-*mdx* hearts.**  
V=Vehicle, P=Perindopril, D=Debio-025, D+P=Debio-025+Perindopril

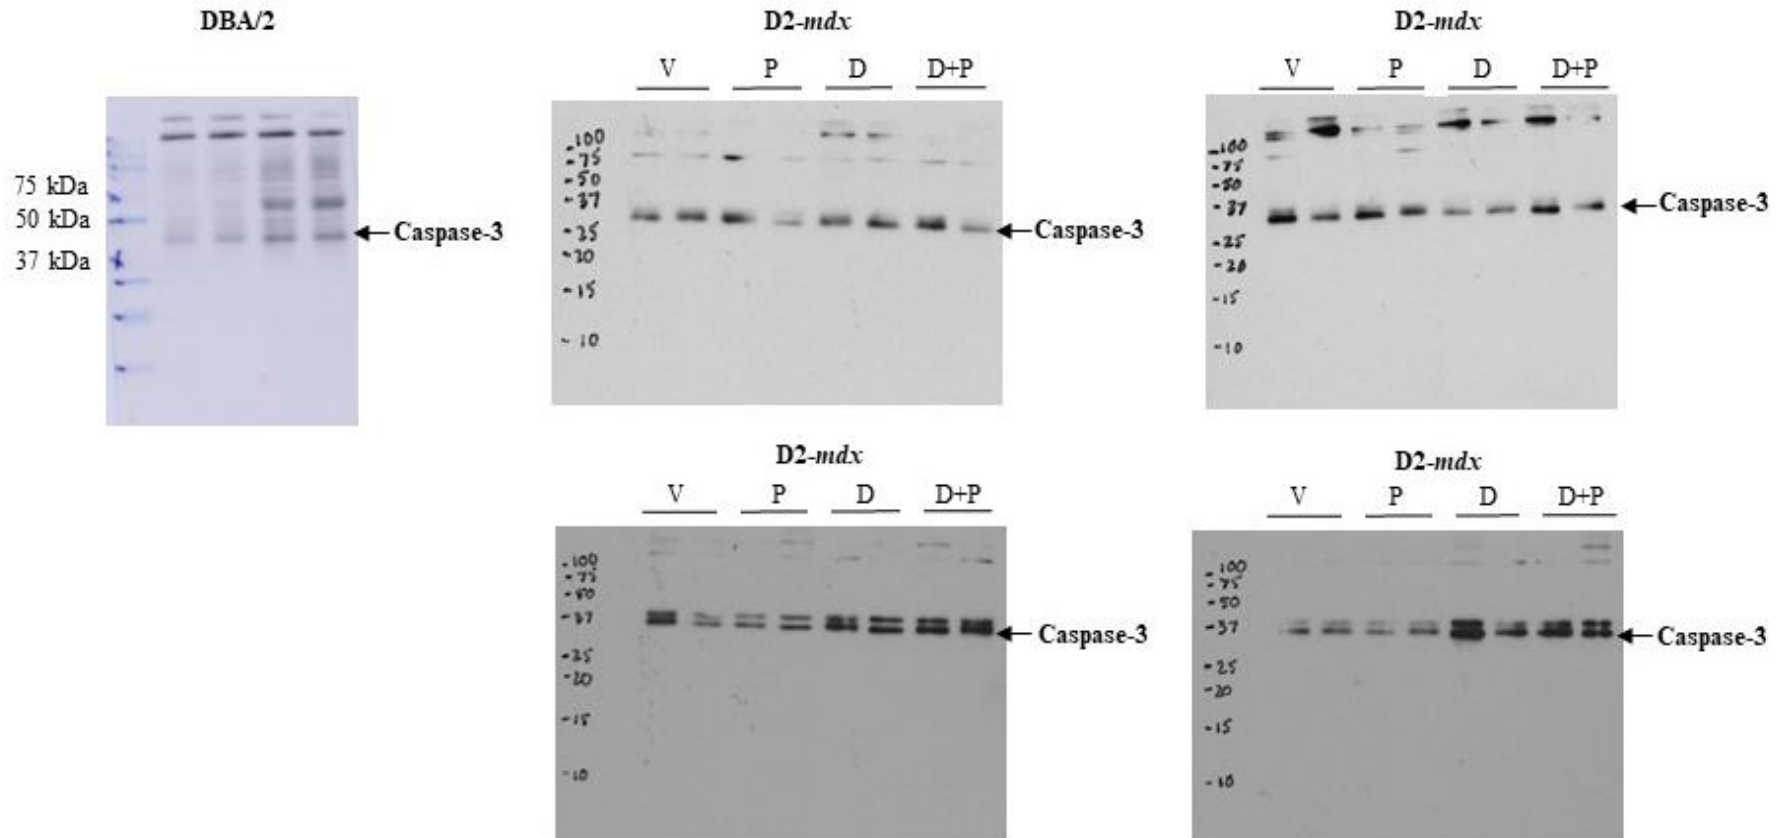

Appendix D. Western immunoblots for t-Akt (60kDa) and p-Akt (60kDa) in DBA/2 and D2-*mdx* hearts.

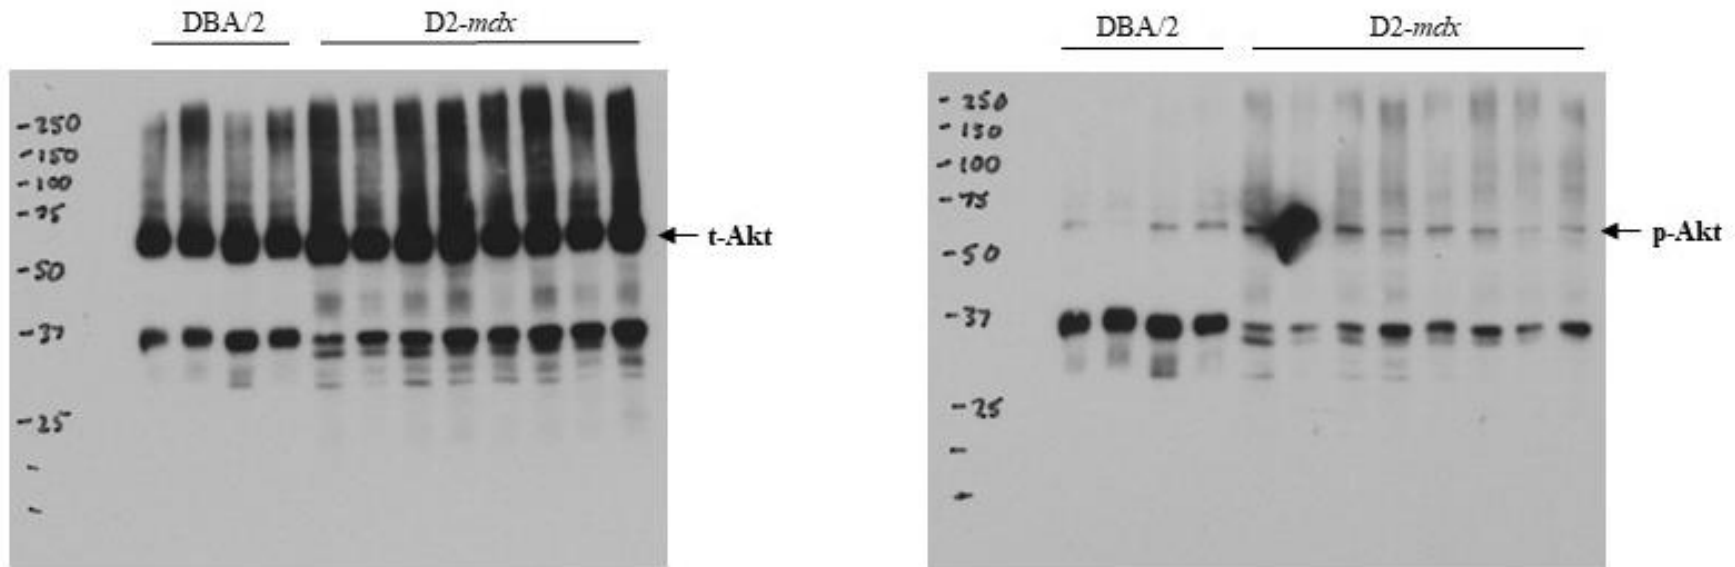

Appendix E. Western immunoblots for t-GSK3 $\beta$  (46kDa) and p-GSK3 $\beta$  (46kDa) in DBA/2 and D2-*mdx* hearts.

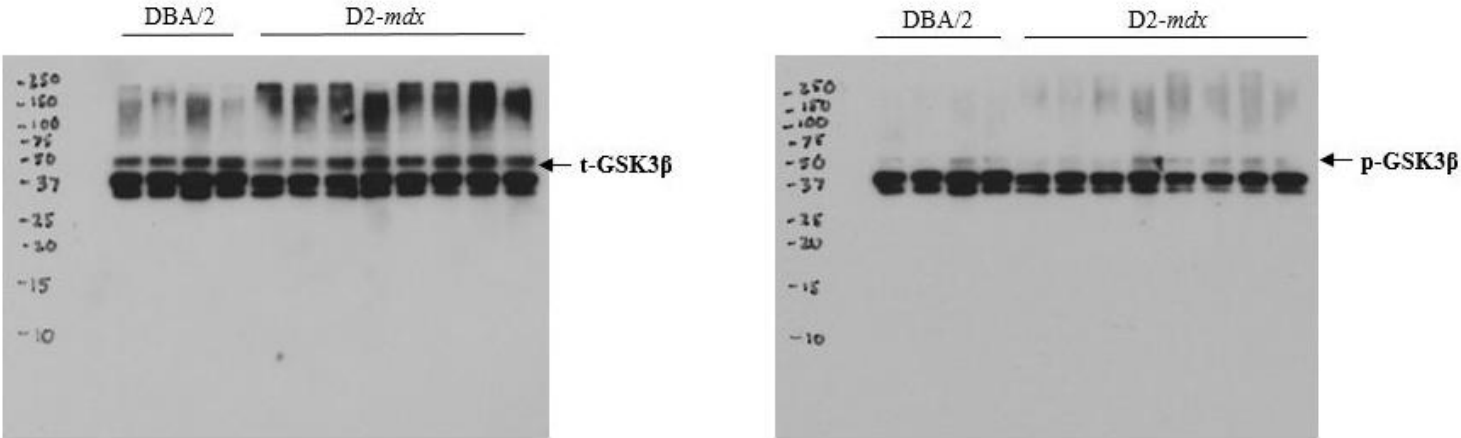

Appendix F. Western immunoblots for Beclin-1 (60kDa) in DBA/2 and treated D2-*mdx* hearts.  
V=Vehicle, P=Perindopril, D=Debio-025, D+P=Debio-025+Perindopril

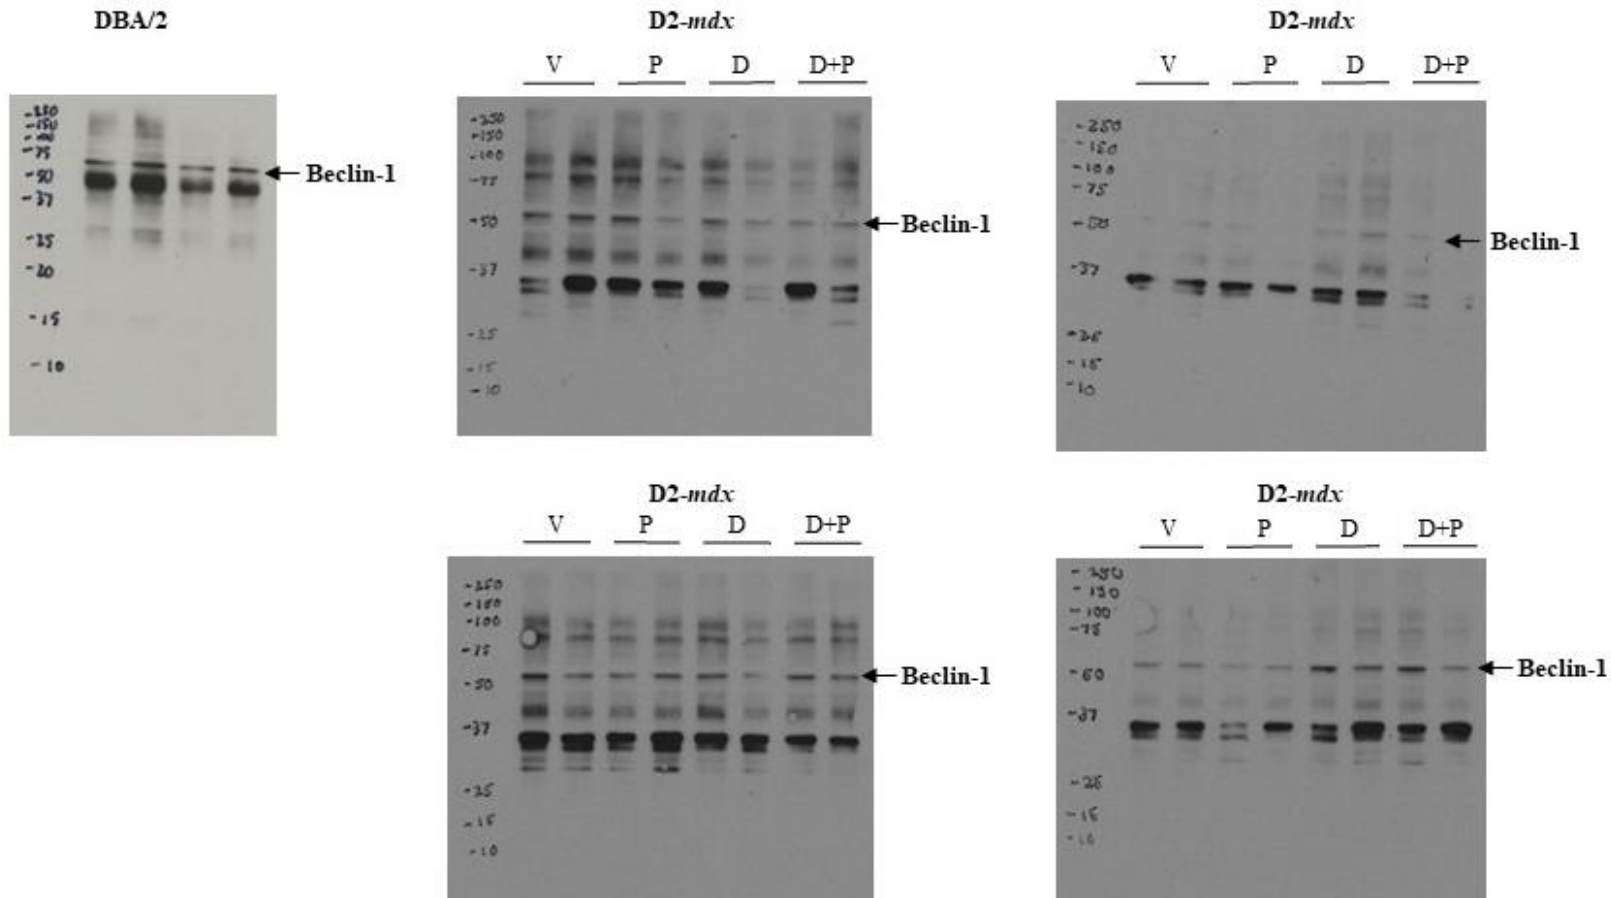

**Appendix G. Western immunoblots for LC3B (16kDa) in DBA/2 and treated D2-*mdx* hearts.**

**V=Vehicle, P=Perindopril, D=Debio-025, D+P=Debio-025+Perindopril**

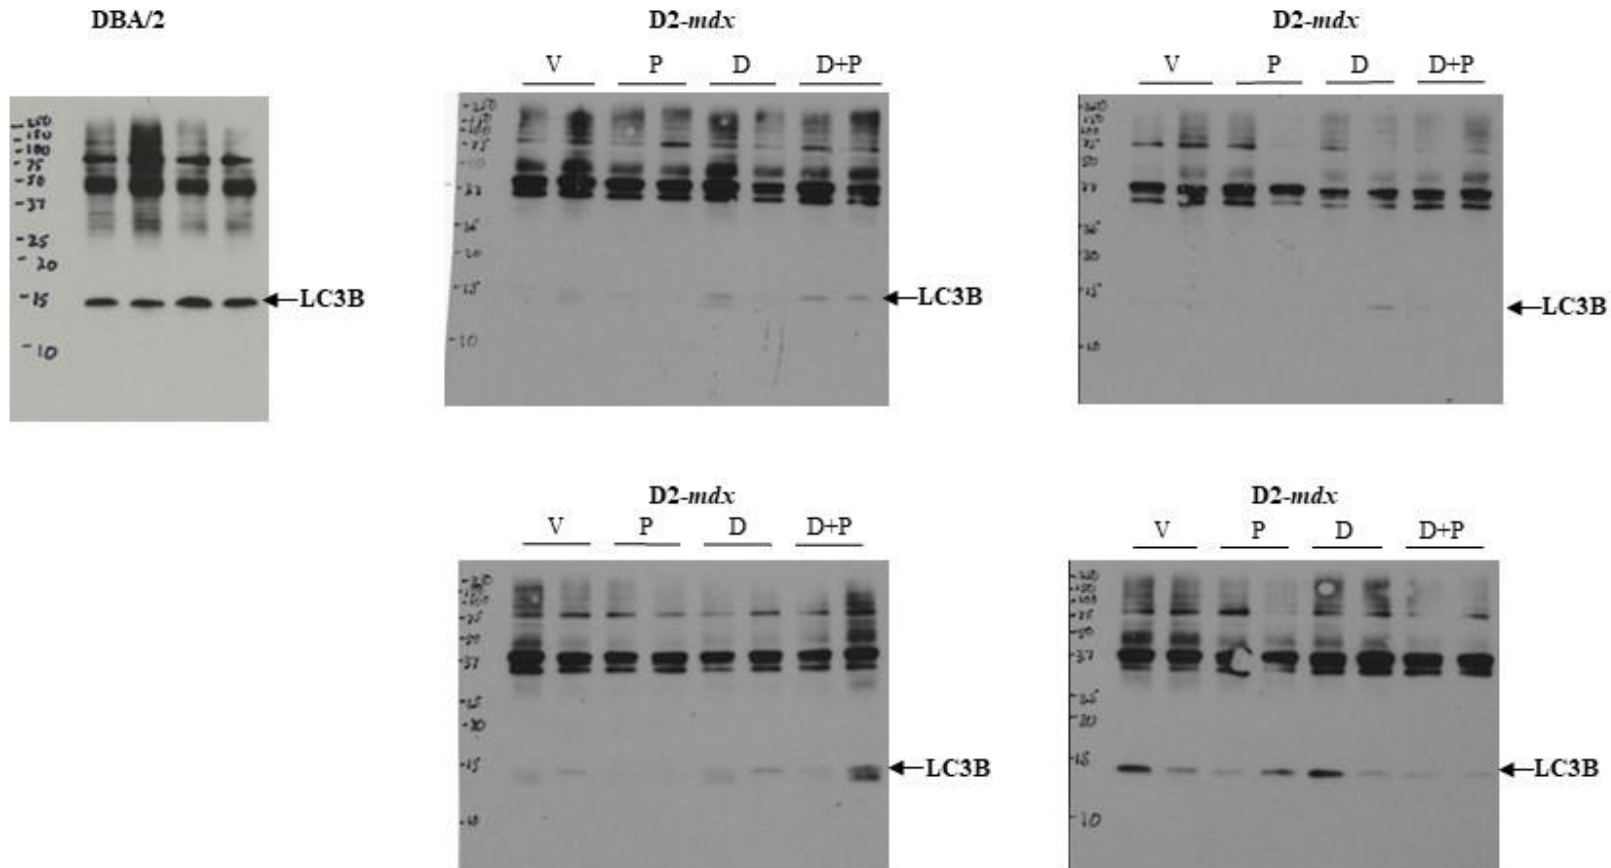

Appendix H. Western immunoblots for p62 (62kDa) in DBA/2 and treated D2-*mdx* hearts.  
V=Vehicle, P=Perindopril, D=Debio-025, D+P=Debio-025+Perindopril

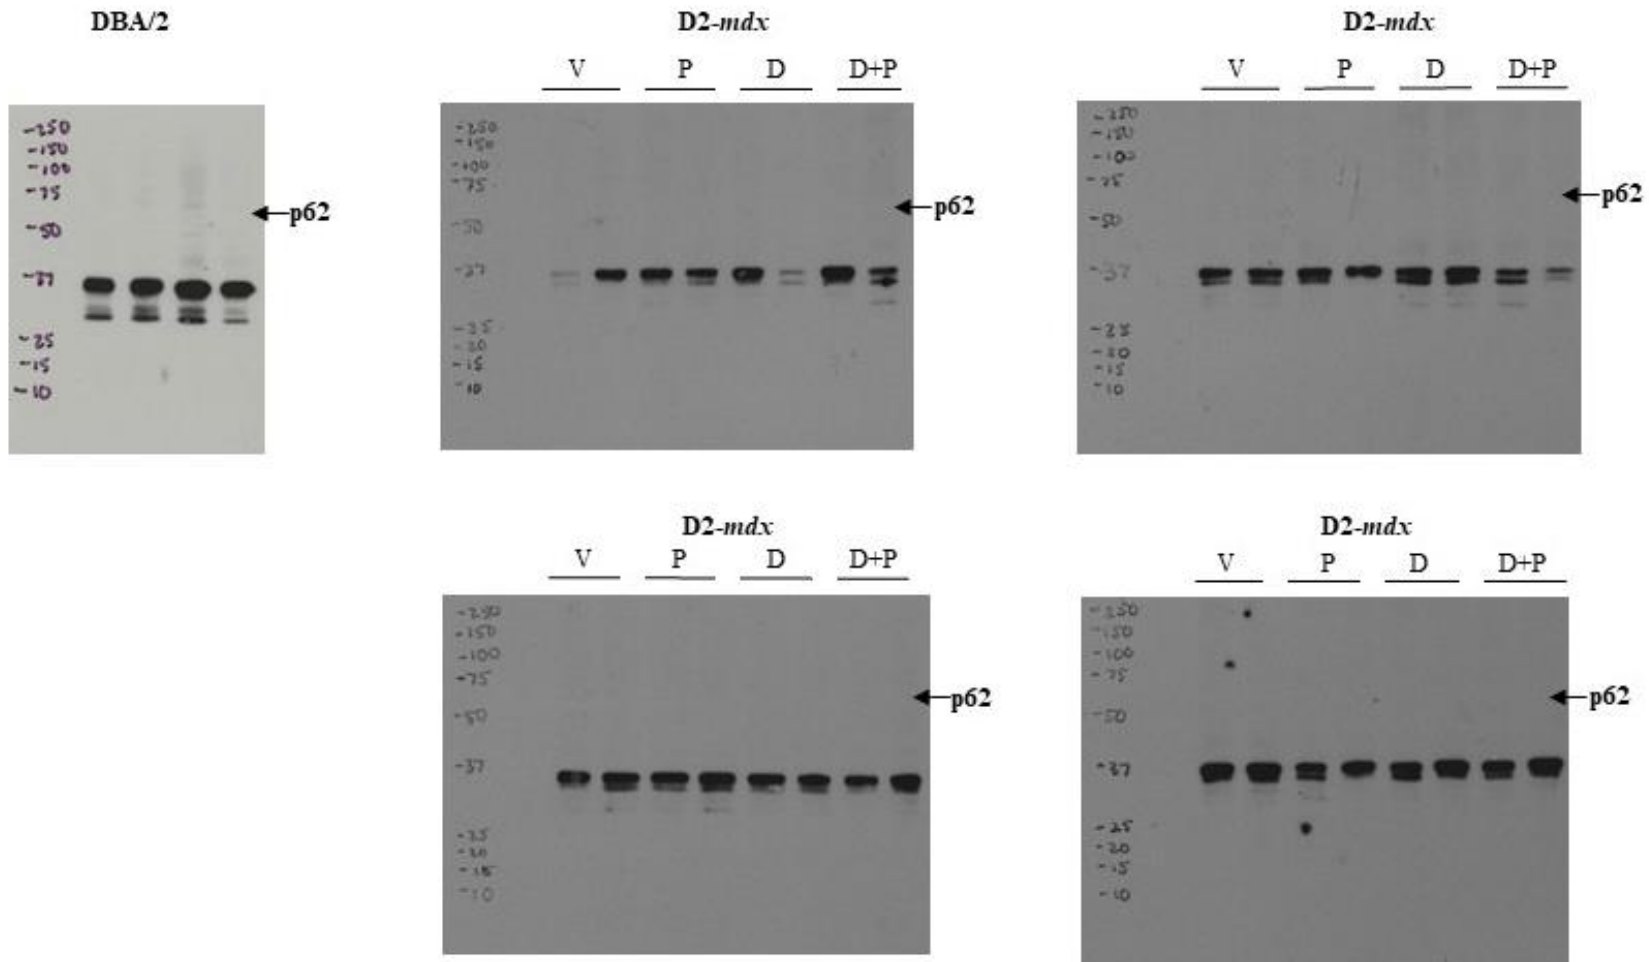



Appendix I. Western immunoblots for NF- $\kappa$ B (50kDa) in DBA/2 and treated D2-*mdx* hearts.  
V=Vehicle, P=Perindopril, D=Debio-025, D+P=Debio-025+Perindopril

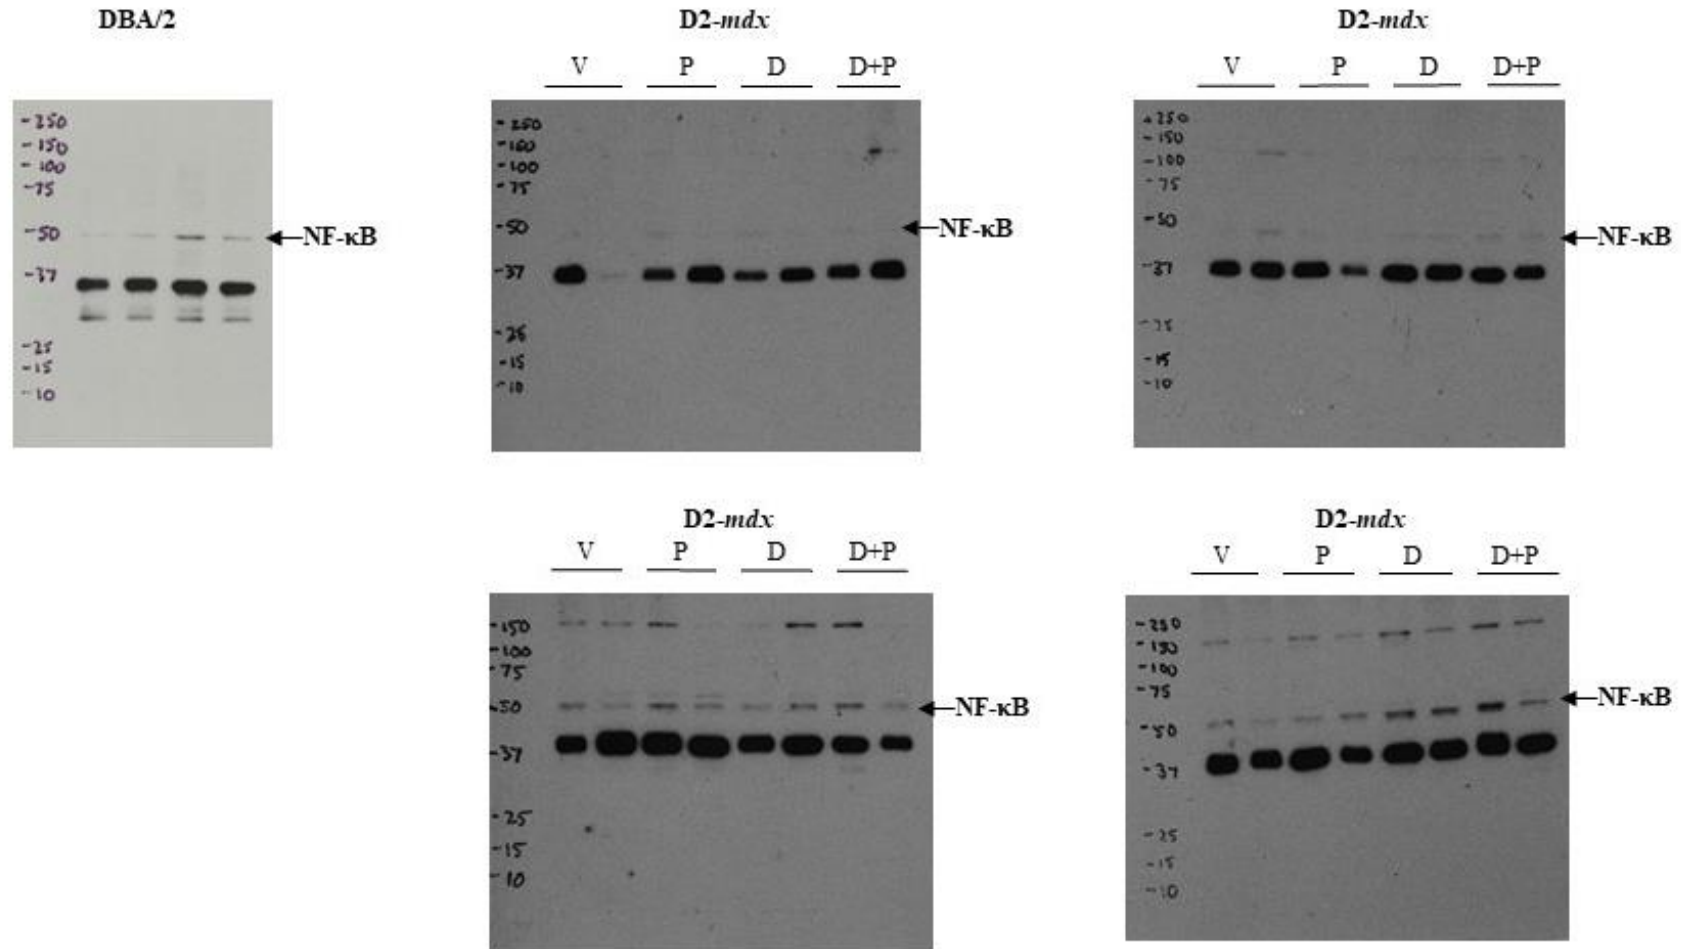

**Appendix J. Western immunoblots for TNF- $\alpha$  (25kDa) in DBA/2 and treated D2-*mdx* hearts.**  
V=Vehicle, P=Perindopril, D=Debio-025, D+P=Debio-025+Perindopril

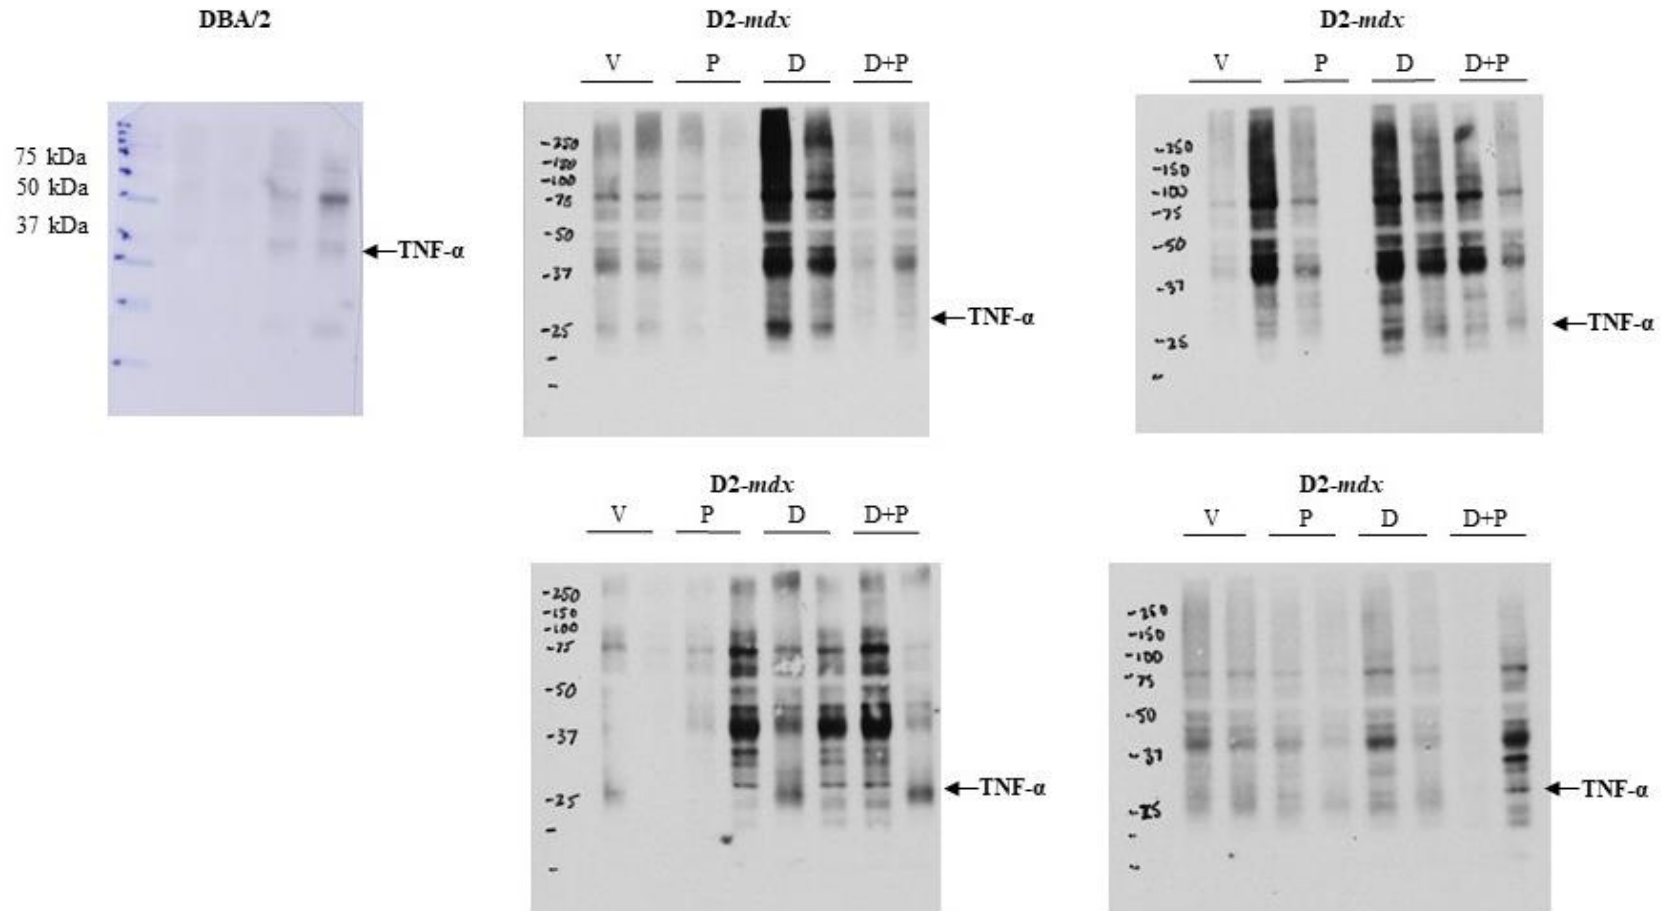

Appendix K. Western immunoblots for monoamine oxidase A (60kDa) in DBA/2 and treated D2-*mdx* hearts. V=Vehicle, P=Perindopril, D=Debio-025, D+P=Debio-025+Perindopril

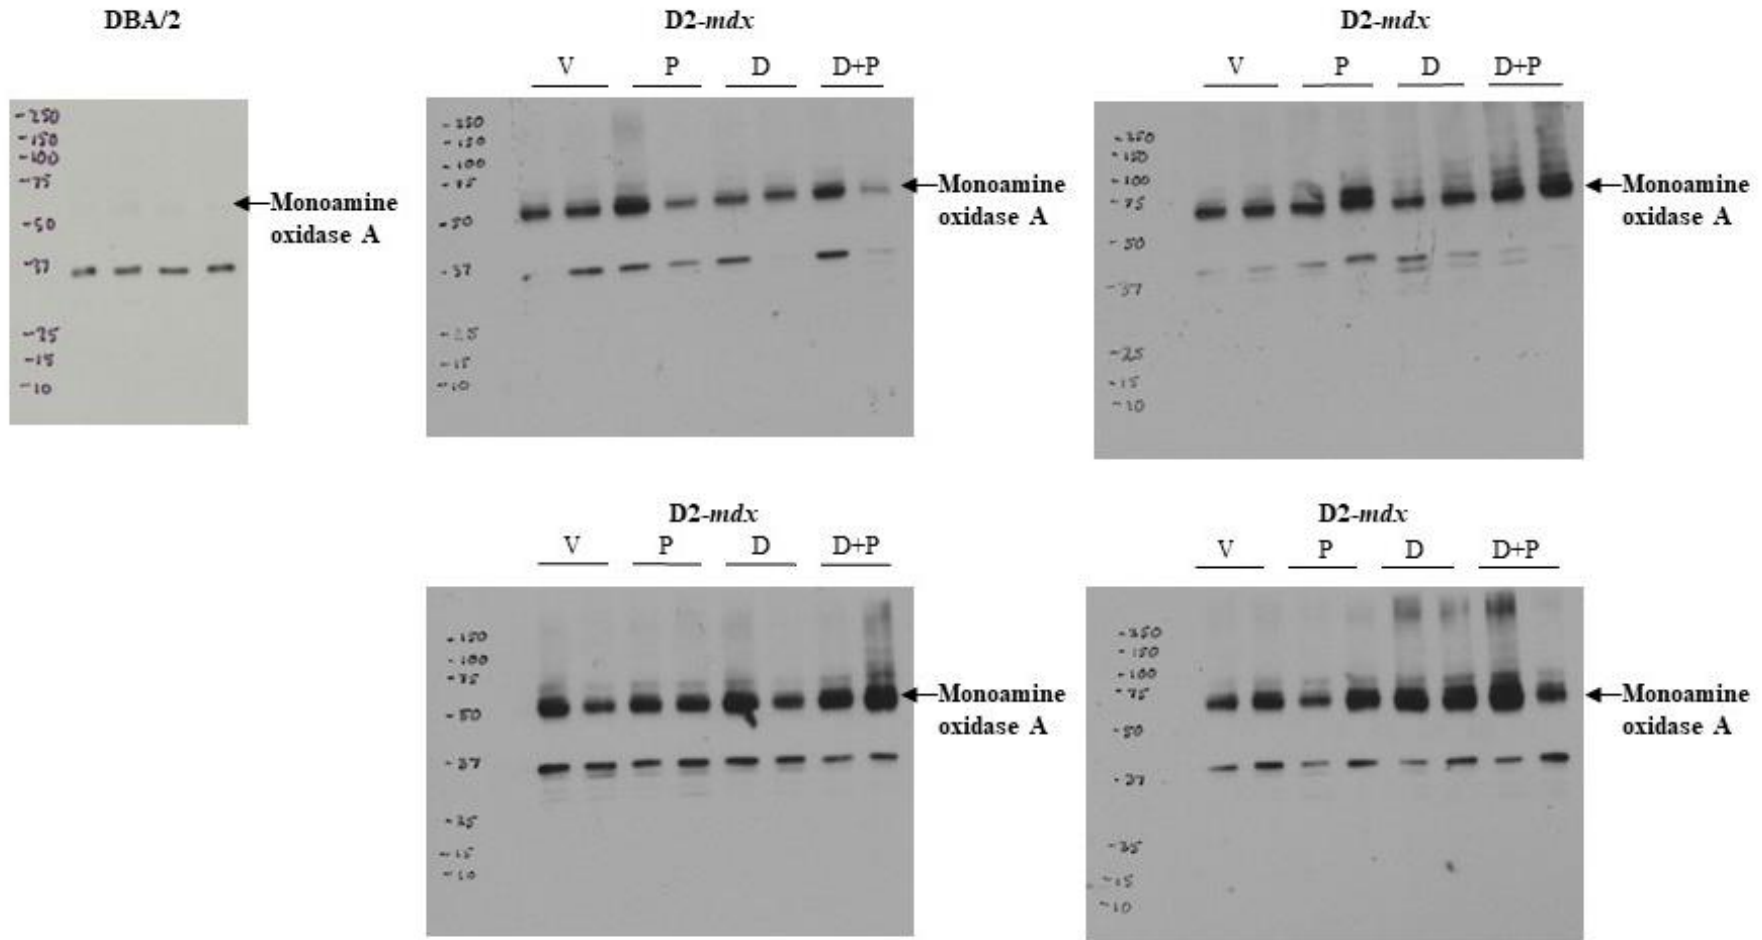

**Appendix L. Western immunoblots for monoamine oxidase B (60kDa) in DBA/2 and treated D2-*mdx* hearts.**  
V=Vehicle, P=Perindopril, D=Debio-025, D+P=Debio-025+Perindopril

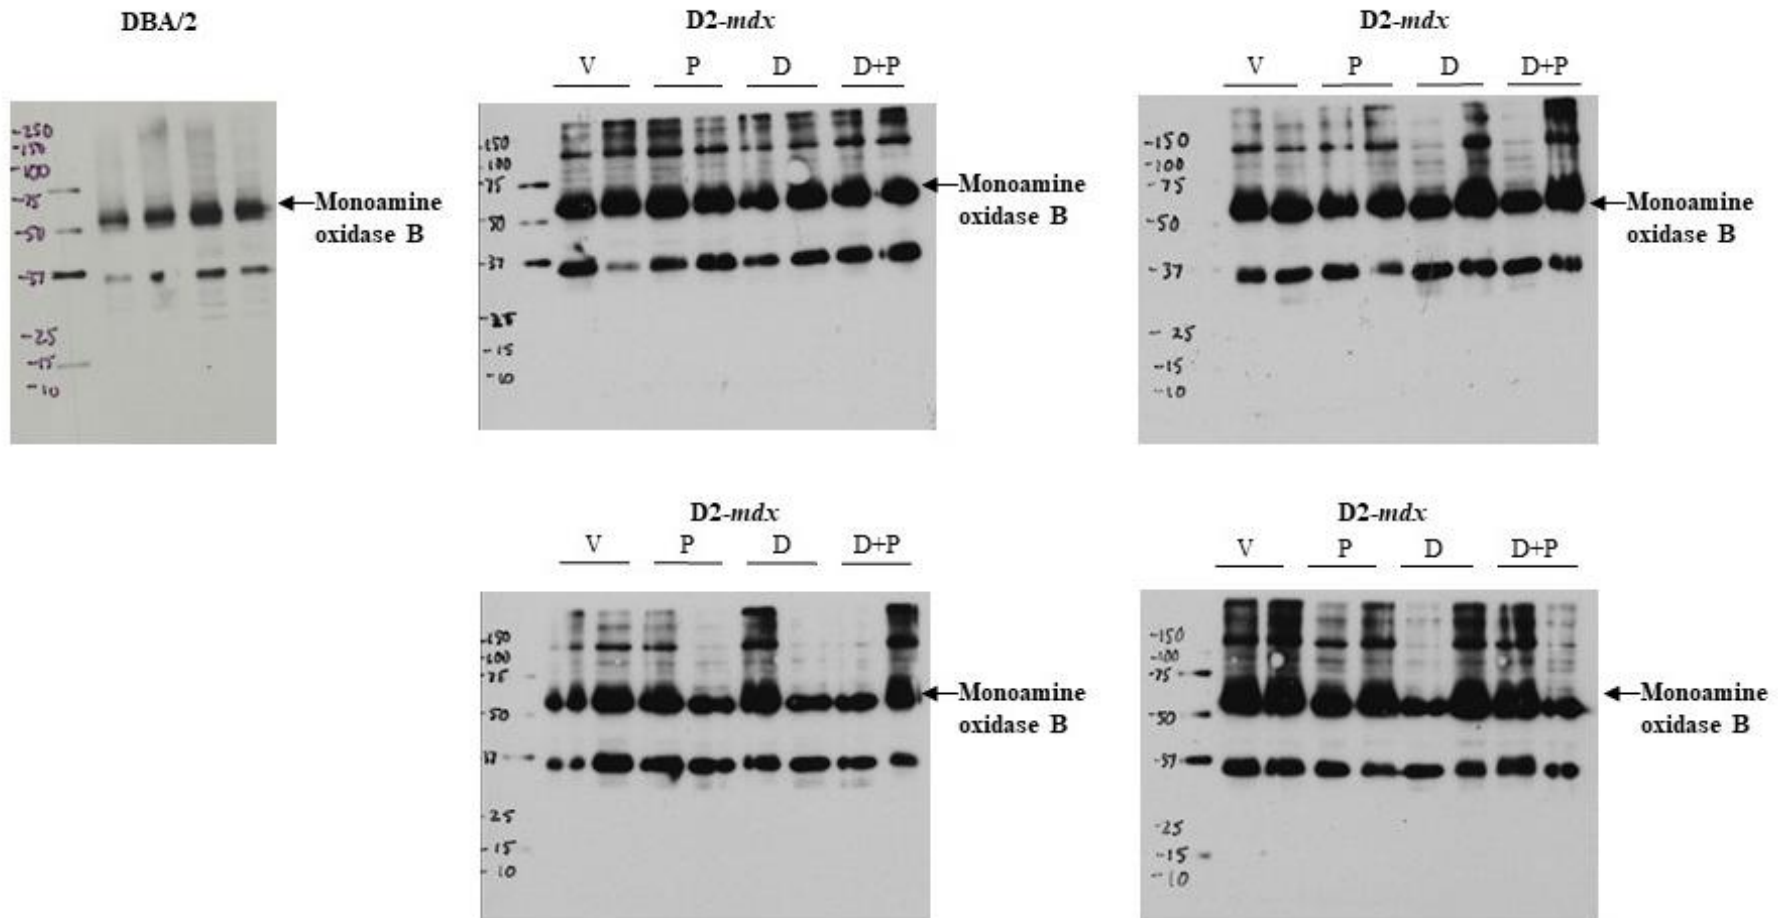

**Appendix M. Examples of coomassie blue staining gels.**  
**V=Vehicle, P=Perindopril, D=Debio-025, D+P=Debio-025+Perindopril**

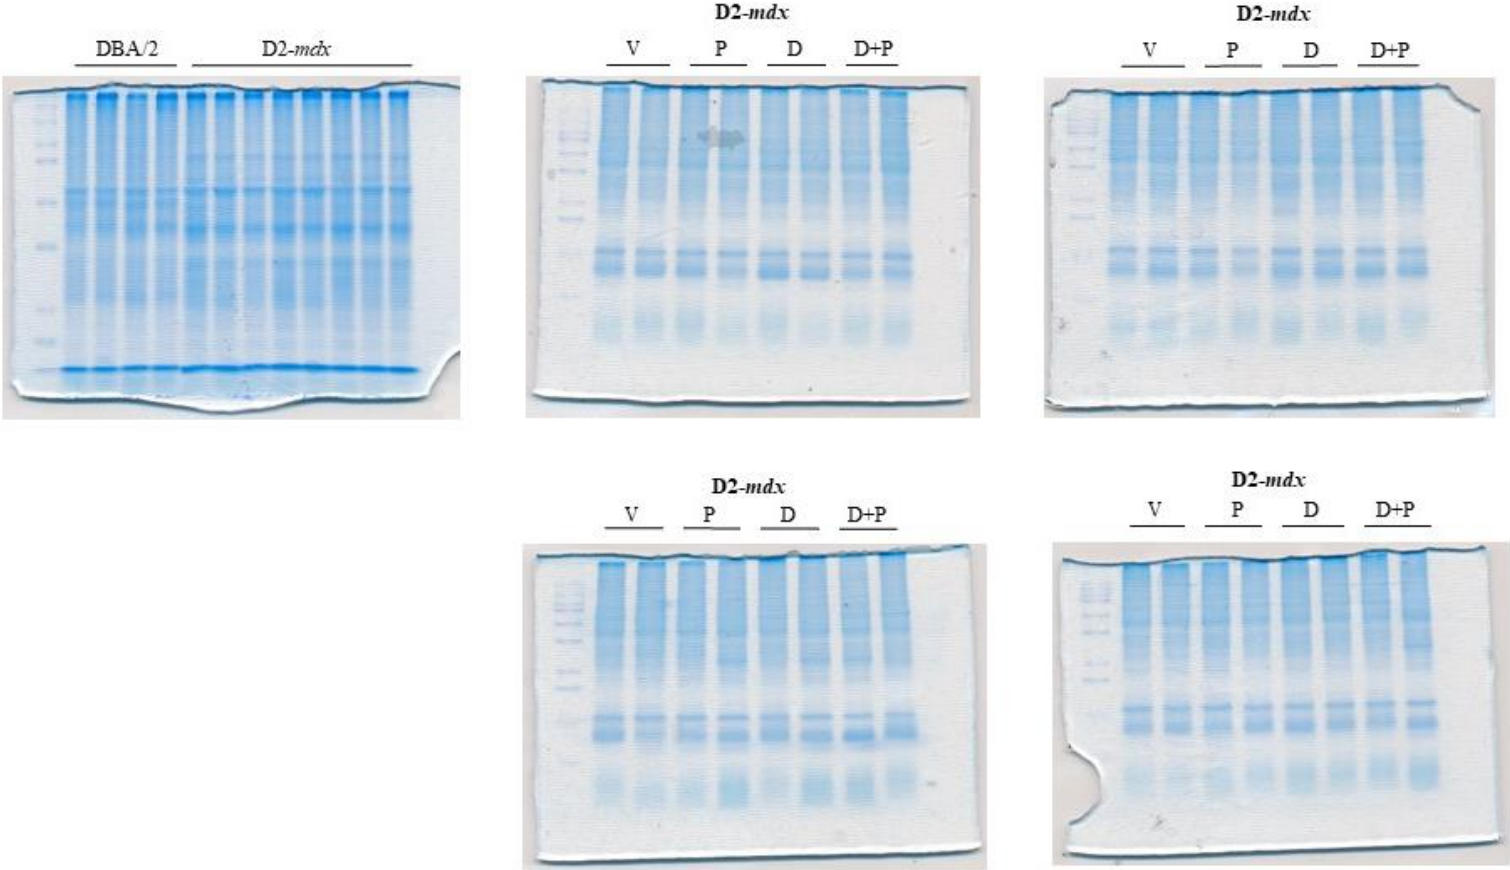

Supplement: f1 [file 5362115.f1.pdf]
